# Supplementary material
Source: Springer Nature journal article supplement (https://www.springermedizin.de/resource/supplementary/13584_2014_128_MOESM1_ESM.pdf/9677030)

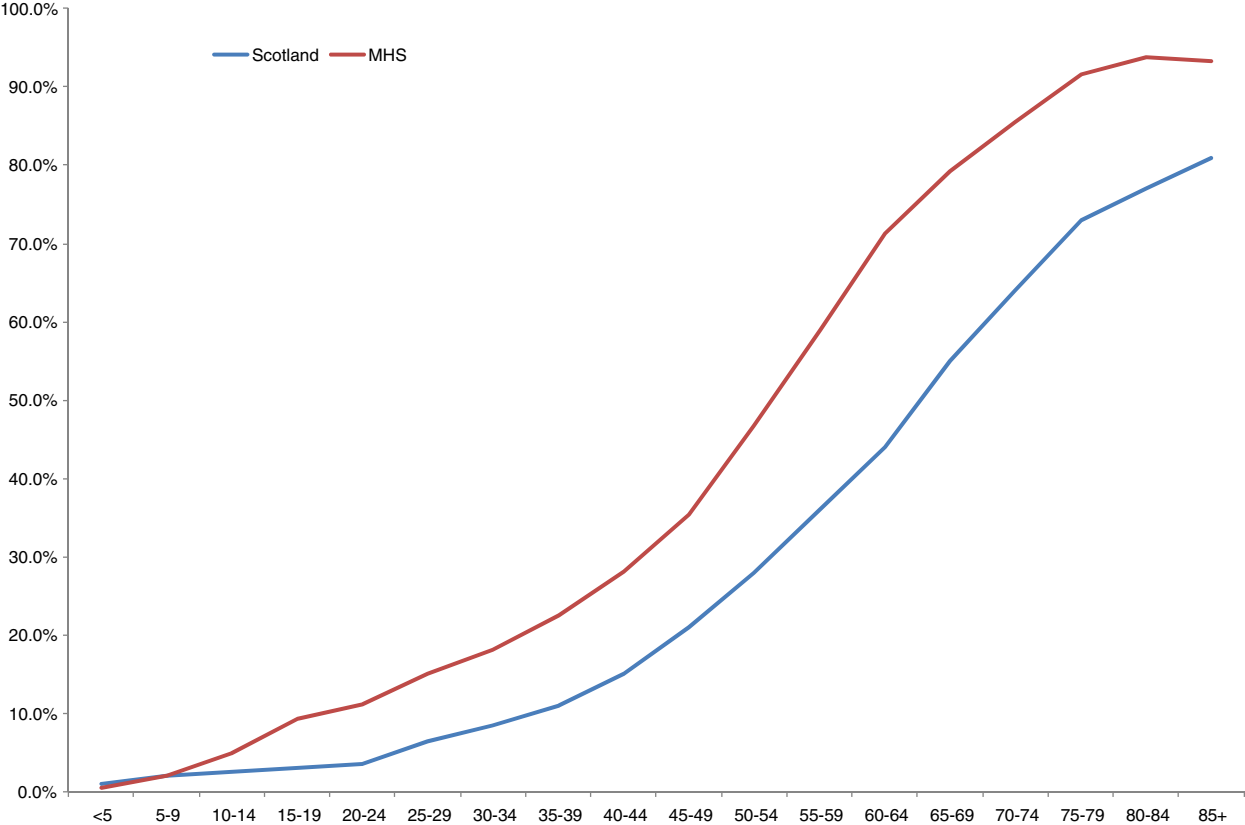

Supplement: MOESM1 [file 9677030]
